# Supplementary material
Source: Springer Nature journal article supplement (https://www.springermedizin.de/resource/supplementary/12913_2013_3391_MOESM2_ESM.pdf/9532676)

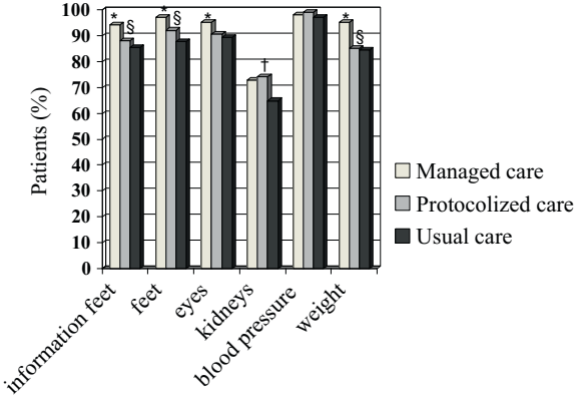

Supplement: MOESM2 [file 9532676]
